# Supplementary material for: Posidonia oceanica (L.) Delile Extract Reduces Lipid Accumulation through Autophagy Activation in HepG2 Cells
Source: MDPI journal article supplement (doi:10.3390/ph14100969), 2021-09-24
Supplement: s1 [file s1]

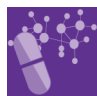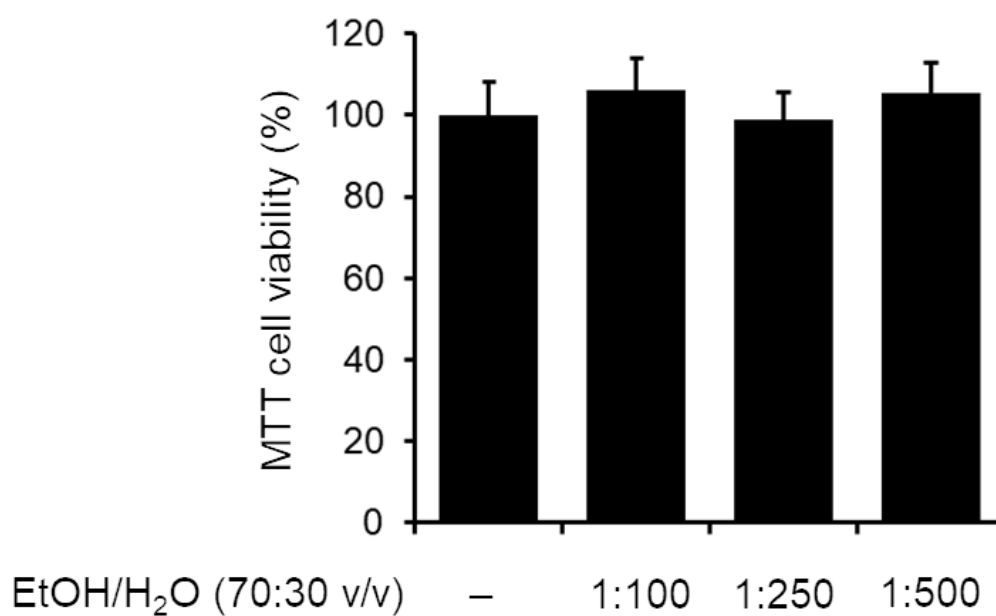

**Figure S1.** The effect of EtOH/H<sub>2</sub>O vehicle (70:30 v/v) on the viability of HepG2 cells. MTT assay on untreated cells (–) or exposed to different dilutions of EtOH/H<sub>2</sub>O (70:30 v/v) for 24h. The amount of EtOH/H<sub>2</sub>O (70:30 v/v) applied corresponds exactly to that used in POE cell treatment. Data were reported as mean  $\pm$  SD of three independent experiments.
